# Supplementary material for: Rationale and Protocol of ETERNITY-ITA Study: Use of Etelcalcetide for Preserving Vitamin K-Dependent Protein Activity Italian Study
Source: Preprints.org preprint supplement (doi:10.20944/preprints202408.0995.v1), 2024-08-14
Supplement: Supplementary file 1 [file supplementary]

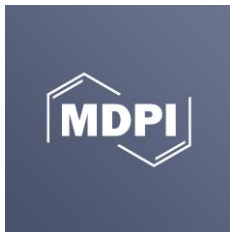

## Authorship Contribution Form

(Must be Completed and Signed by ALL Authors)

MDPI follows the International Committee of Medical Journal Editors ([ICMJE](#)) guidelines which state that, in order to qualify for authorship of a manuscript, the following criteria should be observed:

- Substantial contributions to the conception or design of the work; or the acquisition, analysis, or interpretation of data for the work; AND
- Drafting the work or revising it critically for important intellectual content; AND
- Final approval of the version to be published; AND
- Agreement to be accountable for all aspects of the work in ensuring that questions related to the accuracy or integrity of any part of the work are appropriately investigated and resolved.

MDPI journals require that all authors indicate their specific contributions to the preparation of this manuscript by completing this form.

|                           |  |
|---------------------------|--|
| Journal Name:             |  |
| Manuscript ID (if known): |  |
| Manuscript Title:         |  |
| Authors:                  |  |
| Corresponding Author(s):  |  |

All authors of the paper should:

- ☐ confirm that all listed authors meet the criteria above and all who meet the four criteria are identified as authors
- ☐ confirm that the manuscript has been read and approved by all named authors
- ☐ confirm that the order of authors listed in the manuscript has been approved by all named authors

Please list all the manuscript authors and their contribution in the Contribution Table below. The corresponding author will be responsible to include a summary statement in the text of the manuscript in a separate section “Author Contributions”, that reflects what is recorded in the following table.

List ALL AUTHORS in the same order as the manuscript. (If additional author and signature fields are needed, please duplicate this form as needed):

| Name                | Contribution (please refer to CrediT in Appendix)                                                | Signature                                                                          | Date |
|---------------------|--------------------------------------------------------------------------------------------------|------------------------------------------------------------------------------------|------|
| Maria Fusaro        | Conceptualization, Validation, Formal Analysis, Writing - original draft, Project Administration |  |      |
| Andrea Aghi         | Methodology, Data Curation                                                                       |                                                                                    |      |
| Carmela Marino      | Resources                                                                                        |                                                                                    |      |
| Francesca Mallamaci | Writing - review & editing                                                                       |                                                                                    |      |
| Mario Plebani       | Resources                                                                                        |                                                                                    |      |
| Martina Zaninotto   | Resources                                                                                        |                                                                                    |      |
| Maria Grano         | Resources                                                                                        |                                                                                    |      |
| Silvia Colucci      | Resources                                                                                        |                                                                                    |      |
| Maurizio Gallieni   | Methodology, Writing - review & editing                                                          |                                                                                    |      |
| Thomas Nickolas     | Validation                                                                                       |                                                                                    |      |
| Sandro Giannini     | Validation                                                                                       |                                                                                    |      |
| Stefania Sella      | Validation                                                                                       |                                                                                    |      |
| Paolo Simioni       | Validation                                                                                       |                                                                                    |      |
| Alberto Bazzocchi   | Investigation                                                                                    |                                                                                    |      |
| Giuseppe Guglielmi  | Investigation                                                                                    |                                                                                    |      |

Please list all the manuscript authors and their contribution in the Contribution Table below. The corresponding author will be responsible to include a summary statement in the text of the manuscript in a separate section “Author Contributions”, that reflects what is recorded in the following table.

List ALL AUTHORS in the same order as the manuscript. (If additional author and signature fields are needed, please duplicate this form as needed):

| Name | Contribution (please refer to CrediT in Appendix) | Signature                | Date       |
|------|---------------------------------------------------|--------------------------|------------|
|      |                                                   |                          |            |
|      |                                                   |                          |            |
|      |                                                   |                          |            |
|      |                                                   | <i>Francisco Melkman</i> | 08/07/2024 |
|      |                                                   |                          |            |
|      |                                                   |                          |            |
|      |                                                   |                          |            |
|      |                                                   |                          |            |
|      |                                                   |                          |            |
|      |                                                   |                          |            |
|      |                                                   |                          |            |
|      |                                                   |                          |            |
|      |                                                   |                          |            |
|      |                                                   |                          |            |
|      |                                                   |                          |            |
|      |                                                   |                          |            |

Please list all the manuscript authors and their contribution in the Contribution Table below. The corresponding author will be responsible to include a summary statement in the text of the manuscript in a separate section “Author Contributions”, that reflects what is recorded in the following table.

List ALL AUTHORS in the same order as the manuscript. (If additional author and signature fields are needed, please duplicate this form as needed):

| Name | Contribution (please refer to CrediT in Appendix) | Signature                                                                          | Date |
|------|---------------------------------------------------|------------------------------------------------------------------------------------|------|
|      |                                                   |                                                                                    |      |
|      |                                                   |                                                                                    |      |
|      |                                                   |  |      |
|      |                                                   |                                                                                    |      |
|      |                                                   |                                                                                    |      |
|      |                                                   |                                                                                    |      |
|      |                                                   |                                                                                    |      |
|      |                                                   |                                                                                    |      |
|      |                                                   |                                                                                    |      |
|      |                                                   |                                                                                    |      |
|      |                                                   |                                                                                    |      |
|      |                                                   |                                                                                    |      |
|      |                                                   |                                                                                    |      |
|      |                                                   |                                                                                    |      |
|      |                                                   |                                                                                    |      |

Please list all the manuscript authors and their contribution in the Contribution Table below. The corresponding author will be responsible to include a summary statement in the text of the manuscript in a separate section "Author Contributions", that reflects what is recorded in the following table.

List ALL AUTHORS in the same order as the manuscript. (If additional author and signature fields are needed, please duplicate this form as needed):

| Name                | Contribution (please refer to CrediT in Appendix)                                                | Signature   | Date    |
|---------------------|--------------------------------------------------------------------------------------------------|-------------|---------|
| Maria Fusaro        | Conceptualization, Validation, Formal Analysis, Writing - original draft, Project Administration |             |         |
| Andrea Aghi         | Methodology, Data Curation                                                                       | Andrea Aghi | 18/7/24 |
| Carmela Marino      | Resources                                                                                        |             |         |
| Francesca Mallamaci | Writing - review & editing                                                                       |             |         |
| Mario Plebani       | Resources                                                                                        |             |         |
| Martina Zaninotto   | Resources                                                                                        |             |         |
| Maria Grano         | Resources                                                                                        |             |         |
| Silvia Colucci      | Resources                                                                                        |             |         |
| Maurizio Gallieni   | Methodology, Writing - review & editing                                                          |             |         |
| Thomas Nickolas     | Validation                                                                                       |             |         |
| Sandro Giannini     | Validation                                                                                       |             |         |
| Stefania Sella      | Validation                                                                                       |             |         |
| Paolo Simioni       | Validation                                                                                       |             |         |
| Alberto Bazzocchi   | Investigation                                                                                    |             |         |
| Giuseppe Guglielmi  | Investigation                                                                                    |             |         |

Please list all the manuscript authors and their contribution in the Contribution Table below. The corresponding author will be responsible to include a summary statement in the text of the manuscript in a separate section "Author Contributions", that reflects what is recorded in the following table.

List ALL AUTHORS in the same order as the manuscript. (If additional author and signature fields are needed, please duplicate this form as needed):

| Name                | Contribution (please refer to CrediT in Appendix)      | Signature    | Date       |
|---------------------|--------------------------------------------------------|--------------|------------|
| Maria Fusaro        | Validation, Formal Analysis, Writing - original draft, |              | Testo      |
| Andrea Aghi         | Methodology, Data Curation                             |              |            |
| Carmela Marino      | Resources                                              |              |            |
| Francesca Mallamaci | Writing - review & editing                             |              |            |
| Mario Plebani       | Resources                                              |              |            |
| Martina Zaninotti   | Resources                                              | M. Zaninotti | 07-08-2024 |
| Maria Grano         | Resources                                              | M. Grano     | 08/07/2024 |
| Silvia Colucci      | Resources                                              | S. Colucci   | 08/07/2024 |
| Maurizio Gallieri   | Methodology, Writing - review & editing                | M. Gallieri  | 9/7/2024   |
| Thomas Nickola      | Validation                                             |              | 9/9/24     |
| Andrea Giannini     | Validation                                             |              |            |
| Stefania Sella      | Validation                                             |              |            |
| Paolo Simioni       | Validation                                             | P. Simioni   | 9/07/24    |
| Berto Bazzocchi     | Investigation                                          |              |            |
| Giuseppe Guglielmo  | Investigation                                          | G. Guglielmo | 09/07/2024 |



Please list all the manuscript authors and their contribution in the Contribution Table below. The corresponding author will be responsible to include a summary statement in the text of the manuscript in a separate section "Author Contributions", that reflects what is recorded in the following table.

List ALL AUTHORS in the same order as the manuscript. (If additional author and signature fields are needed, please duplicate this form as needed):

| Name           | Contribution (please refer to CrediT in Appendix) | Signature                                                                           | Date         |
|----------------|---------------------------------------------------|-------------------------------------------------------------------------------------|--------------|
| Maria Fusaro   | Conceptualization, Validation, Formal Analysis    |                                                                                     |              |
| Andrea Aghi    | Methodology, Data Curation                        |                                                                                     |              |
| Carmela Mari   | Resources                                         |                                                                                     |              |
| Francesca Ma   | Writing - review & editing                        |                                                                                     |              |
| Mario Plebani  | Resources                                         |                                                                                     |              |
| Martina Zani   | Resources                                         |                                                                                     |              |
| Maria Grano    | Resources                                         |                                                                                     |              |
| Silvia Colucci | Resources                                         |                                                                                     |              |
| Maurizio Gall  | Methodology, Writing - review & editing           |                                                                                     |              |
| Thomas Nick    | Validation                                        |  |              |
| Sandro Giann   | Validation                                        |                                                                                     | July 8, 2024 |
| Stefania Sella | Validation                                        |                                                                                     |              |
| Paolo Simioni  | Validation                                        |                                                                                     |              |
| Alberto Bazzo  | Investigation                                     |                                                                                     |              |
| Giuseppe Guc   | Investigation                                     |                                                                                     |              |

Please list all the manuscript authors and their contribution in the Contribution Table below. The corresponding author will be responsible to include a summary statement in the text of the manuscript in a separate section "Author Contributions", that reflects what is recorded in the following table.

List ALL AUTHORS in the same order as the manuscript. (If additional author and signature fields are needed, please duplicate this form as needed):

| Name           | Contribution (please refer to CrediT in Appendix) | Signature             | Date       |
|----------------|---------------------------------------------------|-----------------------|------------|
| Maria Fusaro   | Conceptualization, Validation, Formal Analysis    |                       |            |
| Andrea Aghi    | Methodology, Data Curation                        |                       |            |
| Carmela Mari   | Resources                                         |                       |            |
| Francesca Ma   | Writing - review & editing                        |                       |            |
| Mario Plebani  | Resources                                         |                       |            |
| Martina Zanin  | Resources                                         |                       |            |
| Maria Grano    | Resources                                         |                       |            |
| Silvia Colucci | Resources                                         |                       |            |
| Maurizio Gall  | Methodology, Writing - review & editing           |                       |            |
| Thomas Nick    | Validation                                        |                       |            |
| Sandro Giann   | Validation                                        |                       |            |
| Stefania Sella | Validation                                        | <i>Stefania Sella</i> | 08/07/2024 |
| Paolo Simioni  | Validation                                        |                       |            |
| Alberto Bazzo  | Investigation                                     |                       |            |
| Giuseppe Gu    | Investigation                                     |                       |            |



Please list all the manuscript authors and their contribution in the Contribution Table below. The corresponding author will be responsible to include a summary statement in the text of the manuscript in a separate section "Author Contributions", that reflects what is recorded in the following table.

List ALL AUTHORS in the same order as the manuscript. (If additional author and signature fields are needed, please duplicate this form as needed):

| Name                         | Contribution (please refer to CrediT in Appendix)           | Signature         | Date     |
|------------------------------|-------------------------------------------------------------|-------------------|----------|
| Maria Fusaro <sup>+</sup>    | Conceptualization, Validation, Formal Analysis <sup>+</sup> |                   |          |
| Andrea Aghi <sup>+</sup>     | Methodology, Data Curation                                  |                   |          |
| Carmela Maria <sup>+</sup>   | Resources                                                   |                   |          |
| Francesca Ma <sup>+</sup>    | Writing - review & editing                                  |                   |          |
| Mario Plebani <sup>+</sup>   | Resources                                                   | <i>M. Plebani</i> | 07-08-24 |
| Martina Zanin <sup>+</sup>   | Resources                                                   |                   |          |
| Maria Grano <sup>+</sup>     | Resources                                                   |                   |          |
| Silvia Colucci <sup>+</sup>  | Resources                                                   |                   |          |
| Maurizio Gallia <sup>+</sup> | Methodology, Writing - review & editing                     |                   |          |
| Thomas Nick <sup>+</sup>     | Validation                                                  |                   |          |
| Sandro Giann <sup>+</sup>    | Validation                                                  |                   |          |
| Stefania Sella <sup>+</sup>  | Validation                                                  |                   |          |
| Paolo Simioni <sup>+</sup>   | Validation                                                  |                   |          |
| Alberto Bazzo <sup>+</sup>   | Investigation                                               |                   |          |
| Giuseppe Guc <sup>+</sup>    | Investigation                                               |                   |          |

Please list all the manuscript authors and their contribution in the Contribution Table below. The corresponding author will be responsible to include a summary statement in the text of the manuscript in a separate section “Author Contributions”, that reflects what is recorded in the following table.

List ALL AUTHORS in the same order as the manuscript. (If additional author and signature fields are needed, please duplicate this form as needed):

| Name | Contribution (please refer to CrediT in Appendix) | Signature                                                                           | Date |
|------|---------------------------------------------------|-------------------------------------------------------------------------------------|------|
|      |                                                   | 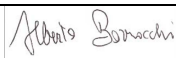 |      |
|      |                                                   |                                                                                     |      |
|      |                                                   |                                                                                     |      |
|      |                                                   |                                                                                     |      |
|      |                                                   |                                                                                     |      |
|      |                                                   |                                                                                     |      |
|      |                                                   |                                                                                     |      |
|      |                                                   |                                                                                     |      |
|      |                                                   |                                                                                     |      |
|      |                                                   |                                                                                     |      |
|      |                                                   |                                                                                     |      |
|      |                                                   |                                                                                     |      |
|      |                                                   |                                                                                     |      |
|      |                                                   |                                                                                     |      |
|      |                                                   |                                                                                     |      |

Please list all the manuscript authors and their contribution in the Contribution Table below. The corresponding author will be responsible to include a summary statement in the text of the manuscript in a separate section “Author Contributions”, that reflects what is recorded in the following table.

List ALL AUTHORS in the same order as the manuscript. (If additional author and signature fields are needed, please duplicate this form as needed):

| Name                | Contribution (please refer to CrediT in Appendix) | Signature      | Date     |
|---------------------|---------------------------------------------------|----------------|----------|
| Maria Fusaro        | Conceptualization, Validation, Formal Analysis    |                |          |
| Andrea Aghi         | Methodology, Data Curation                        |                |          |
| Carmela Marini      | Resources                                         | Carmela Marini | 08.07.24 |
| Francesca Marini    | Writing - review & editing                        |                |          |
| Mario Plebani       | Resources                                         |                |          |
| Martina Zanini      | Resources                                         |                |          |
| Maria Grano         | Resources                                         |                |          |
| Silvia Colucci      | Resources                                         |                |          |
| Maurizio Galligani  | Methodology, Writing - review & editing           |                |          |
| Thomas Nicklisch    | Validation                                        |                |          |
| Sandro Giannini     | Validation                                        |                |          |
| Stefania Sella      | Validation                                        |                |          |
| Paolo Simioni       | Validation                                        |                |          |
| Alberto Bazzoli     | Investigation                                     |                |          |
| Giuseppe Guadagnoli | Investigation                                     |                |          |

Please list all the manuscript authors and their contribution in the Contribution Table below. The corresponding author will be responsible to include a summary statement in the text of the manuscript in a separate section “Author Contributions”, that reflects what is recorded in the following table.

List ALL AUTHORS in the same order as the manuscript. (If additional author and signature fields are needed, please duplicate this form as needed):

[illegible]

## Appendix

### Contributor Roles Taxonomy (CRediT)

|                            |                                                                                                                                                                                                                 |
|----------------------------|-----------------------------------------------------------------------------------------------------------------------------------------------------------------------------------------------------------------|
| Conceptualization          | Ideas; formulation or evolution of overarching research goals and aims.                                                                                                                                         |
| Data curation              | Management activities to annotate (produce metadata), scrub data and maintain research data (including software code, where it is necessary for interpreting the data itself) for initial use and later re-use. |
| Formal analysis            | Application of statistical, mathematical, computational, or other formal techniques to analyze or synthesize study data.                                                                                        |
| Funding acquisition        | Acquisition of the financial support for the project leading to this publication.                                                                                                                               |
| Investigation              | Conducting a research and investigation process, specifically performing the experiments, or data/evidence collection.                                                                                          |
| Methodology                | Development or design of methodology; creation of models.                                                                                                                                                       |
| Project administration     | Management and coordination responsibility for the research activity planning and execution.                                                                                                                    |
| Resources                  | Provision of study materials, reagents, materials, patients, laboratory samples, animals, instrumentation, computing resources, or other analysis tools.                                                        |
| Software                   | Programming, software development; designing computer programs; implementation of the computer code and supporting algorithms; testing of existing code components.                                             |
| Supervision                | Oversight and leadership responsibility for the research activity planning and execution, including mentorship external to the core team.                                                                       |
| Validation                 | Verification, whether as a part of the activity or separate, of the overall replication/reproducibility of results/experiments and other research outputs.                                                      |
| Visualization              | Preparation, creation and/or presentation of the published work, specifically visualization/data presentation.                                                                                                  |
| Writing - original draft   | Preparation, creation and/or presentation of the published work, specifically writing the initial draft (including substantive translation).                                                                    |
| Writing - review & editing | Preparation, creation and/or presentation of the published work by those from the original research group, specifically critical review, commentary or revision – including pre- or post-publication stages.    |
